# Supplementary material for: MIS 5e sea-level history along the Pacific coast of North America
Source: Copernicus journal article supplement (doi:10.5194/essd-14-1271-2022), 2022-03-22
Supplement: Supplementary file 1 [file ESSD 2021 345 Table S1. Last interglacial localities by U-series methods FINAL.xlsx]

## Sheet: Sheet1
Table S1. Terrace fossil localities dated to sea-level high stands of ~100 ka (MIS 5c) and ~120 ka (MIS 5e) the last interglacial period by TIMS U-series methods
Country	State	Figure	Local place name, sample name	Terrace	Fossil locality#*	Type of indicator	WALIS RSL ID	WALIS U-series ID(s)	Latitude**	Longitude**	Fossil locality	Shoreline angle or	Coral species	Growth	Number of	U-series	Best age	Back-calculated	Comments	Reference
		abbreviation							(degrees N)	(degrees W)	elevation	reef elevation		position?	analyses	method***	estimates (ka)****	initial 234U/238U
											(meters)	(meters)
United States	California	CP	Cayucos Point, GK-89-07	Cayucos terrace	LACMIP 11923	SLI	3776	852, 854, 855, 856, 857, 858, 860, 861, 863, 864	35.449814	120.951058	3.5	~8	Balanophyllia elegans	No	10	TIMS	124.6 ± 0.8 to 119.4 ± 0.7	1.1847 to 1.1831		Muhs et al. (2002)
United States	California	CP	Cayucos Point, GK-89-06	Cayucos terrace	LACMIP 11922	SLI	3801	859, 862, 865	35.452036	120.951703	5.0	~8	Balanophyllia elegans	No	3	TIMS	130.4 ± 1.2	1.1778		Muhs et al. (2002)
United States	California	C	Cayucos, Cay-10731	Cayucos terrace	LACMIP 10731	SLI	3688	845, 846, 847, 848, 849, 850, 851, 853, 2980, 2981, 2982, 2983, 2984, 2985, 2986, 2987, 2988, 2889, 2990, 2991	35.449689	120.914550	7.8	>8 but <14	Balanophyllia elegans	No	3	TIMS	109.7 ± 0.6	1.1679	Mixed age population	Muhs et al. (2002)
United States	California	C	Cayucos, Cay-10731	Cayucos terrace	LACMIP 10731				35.449689	120.914550	7.8	>8 but <14	Balanophyllia elegans	No	5	TIMS	116.2 ± 0.9	1.1616	Mixed age population	Muhs et al. (2002)
United States	California	C	Cayucos, MS-6	Cayucos terrace	USGS M9198				35.449689	120.914550	7.8	>8 but <14	Balanophyllia elegans	No	1	TIMS	101.1 ± 1.5	1.1610	Mixed age population	Stein et al. (1991)
United States	California	C	Cayucos, MS-7,8,32,33,35,9,15	Cayucos terrace	USGS M9198				35.449689	120.914550	7.8	>8 but <14	Balanophyllia elegans	No	11	TIMS	117.2 ± 2.1 to 118.6 ± 2.2	1.1740 to 1.1663	Mixed age population	Stein et al. (1991)
United States	California	DC	Diablo Canyon, SLO-2	Q2 terrace	LACMIP 11921	SLI	3808	2995, 2996	35.206228	120.849150	26	~32	Balanophyllia elegans	No	1	AS	108.2 ± 6.2	1.190	Mixed age population	Muhs et al. (1994); Hanson et al. (1994)
United States	California	DC	Diablo Canyon, SLO-7	Q2 terrace	LACMIP 11921				35.206228	120.849150	26	~32	Balanophyllia elegans	No	1	AS	114.4 ± 6.9	1.166	Mixed age population	Muhs et al. (1994); Hanson et al. (1994)
United States	California	PSL	Point San Luis, SLO-1	Q2 terrace	LACMIP 11761	SLI	3777	2997	35.160422	120.756692	12.2	12.8	Balanophyllia elegans	No	1	AS	117.7 ± 7.2	1.153		Muhs et al. (1994); Hanson et al. (1994)
United States	California	SB	Shell Beach, MS-40,41,43	Q2 terrace	USGS M9199	SLI	3807	2292, 2993, 2994	35.1533	120.6618	21	~25	Balanophyllia elegans	No	3	TIMS	126.7 ± 3.4	1.167		Stein et al. (1991); Hanson et al. (1994)
United States	California	SMI	San Miguel Island, SMI-236	Terrace 2	LACMIP 42929	SLI	3778	2998,2999,3000,3001,3002	34.019883	120.316267	21.3	22	Balanophyllia elegans	No	5	TIMS	121.2 ± 0.5 to 113.8 ± 0.7	1.1541 to 1.1536		Muhs et al. (2014)
United States	California	SRI	Santa Rosa Island, SRI-5F	Terrace 2	LACMIP 42940	SLI	3779	3003	34.002983	120.192800	21	24	Balanophyllia elegans	No	1	TIMS	125.5 ± 0.8	1.2019		Muhs et al. (2014)
United States	California	SRI	Santa Rosa Island, SRI-1	Terrace 2	LACMIP 42930	MLI	3782	3004,3005,3006,3007	34.030983	120.045233	6	>7	Balanophyllia elegans	No	4	TIMS	112.7 ± 0.8 to 110.5 ± 0.6	1.1599 to 1.1590		Muhs et al. (2015)
United States	California	SCRZI	Santa Cruz Island, SCI-94-1,3	Terrace T1	No formal fossil locality #	SLI	3811	3008, 3010	34.0518	119.9026	1-8	8	Balanophyllia elegans	No	2	TIMS	138.6 ± 1.9	1.1733		Pinter et al. (1998)
United States	California	SCRZI	Santa Cruz Island, SCI-94-2	Terrace T1	LACMIP 42339	SLI	3812	3009	33.97989	119.865410	12	~16	Balanophyllia elegans	No	1	TIMS	128.0 ± 0.9	1.1923		Pinter et al. (1998)
United States	California	SNI	San Nicolas Island, SNI-VIZ Pt; GK-91-14	Terrace 2	LACMIP 10622	SLI	3774	913, 914, 915, 916, 917, 918, 919, 920, 921, 922, 923, 924, 925, 926, 927, 928, 929, 930, 931, 932, 933, 934, 935, 936, 937, 938	33.261620	119.568638	31.5	shoal?	Balanophyllia elegans	No	26	TIMS	121.6 ± 1.2 to 118.9 ± 0.7	1.1528 to 1.1495		Muhs et al. (2006)
United States	California	SNI	San Nicolas Island, 11006	Terrace 2b	LACMIP 11006	SLI	3813	977,978,979,980,981,982,983,984,985,986,987,988,989	33.2647	119.4977	19	33	Balanophyllia elegans	No	6	TIMS	102.2 ± 0.5 to 98.0 ± 0.6	1.1653 to 1.1606	Mixed age population	Muhs et al. (2012)
United States	California	SNI	San Nicolas Island, 11006	Terrace 2b	LACMIP 11006				33.2647	119.4977	19	33	Balanophyllia elegans	No	7	TIMS	122 ± 0.9	1.1774	Mixed age population	Muhs et al. (2012)
United States	California	SNI	San Nicolas Island, 50 m S of 11006	Terrace 2b	LACMIP 43030	SLI	3814	961,962,963,964,965,966,967,968,969,970,971,972,973,974,975,976	33.2642	119.4976	20	33	Balanophyllia elegans	No	6	TIMS	97.6 ± 0.5	1.1542	Mixed age population	Muhs et al. (2012)
United States	California	SNI	San Nicolas Island, 50 m S of 11006	Terrace 2b	LACMIP 43030				33.2642	119.4976	20	33	Balanophyllia elegans	No	9	TIMS	120.2 ± 0.7 to 115.1 ± 0.6	1.1684 to 1.1616	Mixed age population	Muhs et al. (2012)
United States	California	SNI	San Nicolas Island, 11752	Terrace 2b	LACMIP 11752	SLI	3815	951,952,953,954,955,956,957,958,959,960	33.2201	119.4562	~17	>30.7 but <35.3	Balanophyllia elegans	No	9	TIMS	104.3 ± 0.6	1.1808	Mixed age population	Muhs et al. (2012)
United States	California	SNI	San Nicolas Island, 11752	Terrace 2b	LACMIP 11752				33.2201	119.4562	~17	>30.7 but <35.3	Balanophyllia elegans	No	1	TIMS	114.2 ± 1.3	1.1852	Mixed age population	Muhs et al. (2012)
United States	California	SNI	San Nicolas Island, 11749	Terrace 2b	LACMIP 11749	SLI	3816	939,940,941,942,943,944,945,946,947,948,949,950	33.239849	119.444817	17.9	28	Balanophyllia elegans	No	12	TIMS	125.6 ± 0.7	1.2019		Muhs et al. (2012)
United States	California	SNI	San Nicolas Island, SNI-GPS-302	Terrace 2a	LACMIP 43029	SLI	3817	990,991,992,993,994,995,996,997	33.266051	119.502159	36.2	38.0	Balanophyllia elegans	No	8	TIMS	122.1 ± 0.9 to 116.7 ± 0.9	1.1584 to 1.1460		Muhs et al. (2012)
United States	California	PV	Palos Verdes Hills, GK-101-1	Gaffey terrace	LACMIP 12608	SLI	3784	909, 910, 911, 912	33.73163	118.34925	65	>67 but <96	Balanophyllia elegans	No	4	TIMS	119.3 ± 0.7 to 113.2 ± 0.9	1.1503 to 1.1465		Muhs et al. (2006)
United States	California	NB	Newport Bay, FP-28a,b,c	Terrace 2	SDSU 3812	SLI	3820	3021, 3022, 3023	33.6411	117.8837	24	33-34	Paracyathus pedroensis	No	3	TIMS	122.5 ± 1.2****	1.1569****		Grant et al. (1999)
United States	California	NB	Newport Bay, 12654-0,1,2	Terrace 2	LACMIP 12654	SLI	3821	3025, 3026, 3027	33.575	117.839	29-30.5	35-36	Balanophyllia elegans	No	3	TIMS	137.5 ± 1.9****	1.236****		Grant et al. (1999)
United States	California	SCI	San Clemente Island, SCI-18, Eel Pt.	Terrace 2b	LACMIP 10725	SLI	3775	880, 881, 882, 883, 884, 885, 886, 887, 888, 889, 890, 891, 892, 893, 894	32.918993	111.545047	12.4	24	Balanophyllia elegans	No	15	TIMS	128.3 ± 2.2 to 114.5 ± 1.0	1.1593 to 1.1497		Muhs et al. (2002)
United States	California	SCI	San Clemente Island, GK-99-10	Terrace 2b	LACMIP 12007	SLI	3800	895, 896, 897, 898, 899, 900, 901, 902, 903, 904, 905, 906, 907, 908	32.918301	111.545307	10.3	24	Balanophyllia elegans	No	14	TIMS	122.2 ± 0.6 to 120.1 ± 0.7	1.1584 to 1.1573		Muhs et al. (2002)
United States	California	PL	Point Loma, NT-SD	Nestor terrace	LACMIP 10167	SLI	3785	867, 868, 869, 870, 871, 872, 873, 874, 875, 876, 877, 878, 879	32.691462	117.250932	20-25	~25	Balanophyllia elegans	No	3	TIMS	109.4 ± 0.5	1.1858	Mixed age population	Muhs et al. (2002)
United States	California	PL	Point Loma, NT-SD	Nestor terrace	LACMIP 10167				32.691462	117.250932	20-25	~25	Balanophyllia elegans	No	10	TIMS	115.4 ± 0.6	1.1730	Mixed age population	Muhs et al. (2002)
United States	California	PL	Point Loma, MS-50,52,56,58	Nestor terrace	USGS M9200	SLI	3822	3028, 3029, 3030, 3031	32.688740	117.249659	22	~25	Balanophyllia elegans	No	4	TIMS	133.2 ± 2.6	1.1864		Stein et al. (1991)
Mexico	Baja California	PB	Punta Banda, PB-SCT-01	Sea Cave terrace	LACMIP 10130	SLI	3802	820,821,822,823,824,825,826,827,828,829,830,831,832,833,834,835	31.7423	116.7410	~33	33-35	Balanophyllia elegans	No	16	TIMS	123.8 ± 1.2 to 114.6 ± 0.7	1.1591 to 1.1499		Muhs et al. (2002)
Mexico	Baja California	IG	Isla Guadalupe, GI-01-c	Discovery Pt. Fm.	SDSU 0644	SLI	3803	813,815,817	28.932	118.229	~1 to ~8	8?	Pocillopora guadalupensis	No	3	TIMS	122.9 ± 0.7 to 118.3 ± 1.3	1.1560 to 1.1588		Muhs et al. (2002)
Mexico	Baja California	IG	Isla Guadalupe, GI-2	Discovery Pt. Fm.	SDSU 0633	SLI	3804	814,819	28.980	118.228	~1 to ~8	8?	Pocillopora guadalupensis	No	2	TIMS	127.6 ± 1.4	1.1617		Muhs et al. (2002)
Mexico	Baja California	IG	Isla Guadalupe, GI-03-a	Discovery Pt. Fm.	SDSU 2465	SLI	3805	816,818	28.968	118.225	~1 to ~8	8?	Pocillopora guadalupensis	No	2	TIMS	123.1 ± 0.7	1.1597		Muhs et al. (2002)
Mexico	Baja California Sur	MU	Mulegé	Mulegé terrace	SDSU 3258	SLI	3823	3032	26.9017	111.9529	<12	12	Porites panamensis	No	1	AS	145.9 ± 27.5	1.1510		Ashby et al. (1987)
Mexico	Baja California Sur	MU	Mulegé	Mulegé terrace	SDSU 3261	SLI	3824	3139	26.9069	111.9566	<12	12	Porites panamensis	No?	1	AS	124.0 ± 20.3	1.1561		Ashby et al. (1987)
Mexico	Baja California Sur	BM	Bahia Magdalena, AO-3	Unnamed	AMNH F-6	SLI	3707	3034,3035	24.6452	112.1416	1 to 1.8	6	Porites panamensis	No	2	AS	114.0 ± 17.5	1.1104		Omura et al. (1979)
Mexico	Baja California Sur	BM	Bahia Magdalena, AO-6	Unnamed	CAS 754				24.6452	112.1416	1 to 1.8	6	Porites panamensis	No	2	AS	114.9 ± 24.6	1.1936		Omura et al. (1979)
Mexico	Baja California Sur	BSN	Bahia San Nicolas North, LU 1050	Unnamed	No formal fossil locality #	SLI	3741	3036	26.604	111.569	?	~16	Porites sp.	No?	1	AS	~131****	1.164****		Ortlieb (1987)
Mexico	Baja California Sur	IC	Isla Coronado	Unnamed	No formal fossil locality #	SLI	3818	3012	26.1095	111.2728	<12	12	Pavona gigantea	Yes	1	TIMS	127.2 ± 0.6	1.1735		Johnson et al. (2007); Muhs et al. (2014)
Mexico	Baja California Sur	PC	Punta Chivato	Unnamed	No formal fossil locality #	SLI	3819	3011	27.0715	111.9584	7.5	8.5	Porites panamensis	Yes	1	TIMS	117.7 ± 0.6	1.1476		Johnson (2002); Johnson et al. (2007); Muhs et al. (2014)
Mexico	Baja California Sur	PCO	Bahía Coyote, KM-26-1	Unnamed	No formal fossil locality #	SLI	3826	3037	24.568633	110.741667	13-16	18-22?	Porites panamensis	Yes	1	TIMS	138.6 ± 4****	1.180****		DeDiego-Forbis et al. (2004)
Mexico	Baja California Sur	PCO	Bahía Coyote, LAS N-07	Unnamed	No formal fossil locality #	SLI	3827	3038	24.548756	110.741667	13-16	18-22?	Porites panamensis	Yes	1	TIMS	138.2 ± 0.9****	1.2014****		DeDiego-Forbis et al. (2004)
Mexico	Baja California Sur	LP	La Paz, Ensenada El Coyote, C-A, C-B	Unnamed	USGS M8860	SLI	3828	3039,3040	24.3040	110.2440	4-6	10?	Pocillopora sp.	No	2	AS	146.6 ± 21.2 to 135.3 ± 15.2	1.1739 to 1.1743		Szabo et al. (1990)
Mexico	Baja California Sur	LP	La Paz, Playa Tecolote, S-5	Unnamed	No formal fossil locality #	SLI	3829	3041	24.3389	110.3051	8	8?	Pocillopora sp.	No	1	AS	122.0 ± 11.4	1.066		Sirkin et al. (1990)
Mexico	Baja California Sur	LP	La Paz, Playa Tecolote S-6	Unnamed	No formal fossil locality #	SLI	3830	3042	24.3386	110.3058	1.5	8?	Porites panamensis	No	1	AS	138.5 ± 13.5	1.087		Sirkin et al. (1990)
Mexico	Baja California Sur	LP	La Paz, Ensenada El Coyote, S-1	Unnamed	No formal fossil locality #	SLI	3831	3043	24.3124	110.2306	7-10	10?	Porites panamensis	No?	1	AS	126.2 ± 12.7	1.124		Sirkin et al. (1990); Szabo et al. (1990)
Mexico	Baja California Sur	CE	Isla Cerralvo	Unnamed	No formal fossil locality #	SLI	3832	3044	24.1498	109.8658	3.1	8.7?	Porites panamensis	Yes	1	TIMS	125.5 ± 0.4****	1.163****	Authors note high 232Th	Tierney and Johnson (2012)
Mexico	Baja California Sur	CPU	Cabo Pulmo, Baja-2, 2A	Unnamed	LACMIP 11739	SLI	3806	810, 811, 812	23.4314	109.4285	1-6	6	Porites sp.	No	2	TIMS	127.3 ± 1.1	1.1666		Muhs et al. (2002)
Mexico	Baja California Sur	CPU	Cabo Pulmo, Baja-5	Unnamed	LACMIP 11739				23.4314	109.4285	1-6	6	Pocillopora sp.	No	1	TIMS	139.7 ± 1.2	1.1890		Muhs et al. (2002)
*LACMIP = Natural History Museum of Los Angeles County, Invertebrate Paleontology
USGS M = U.S. Geological Survey, Menlo Park
SDSU = San Diego State University
AMNH = American Museum of Natural History
CAS = California Academy of Sciences
**Coordinates measured in the field by the author are accurate to ± 1 m; coordinates elsewhere in the USA probably accurate to ± 10 m; coordinates in Mexico probably accurate to ± 100 m
***TIMS = thermal ionization mass spectrometry; AS = alpha spectrometry (recalculated ages use 230Th/238U values calculated by the author from original published data)
****Recalculated ages based on half-lives in Cheng et al. (2013); where "****" appears in cells, recalculated ages and initial 234U/238U values are approximate, because original publication did not include measured (present) 234U/238U values or original publication did not include 230Th/238U values
