# Supplementary material for: MIS 5e sea-level history along the Pacific coast of North America
Source: Copernicus journal article supplement (doi:10.5194/essd-14-1271-2022), 2022-03-22
Supplement: Supplementary file 1 [file essd-14-1271-2022-supplement.zip]

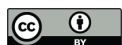

## *Supplement of*

# **MIS 5e sea-level history along the Pacific coast of North America**

**Daniel R. Muhs**

*Correspondence to:* Daniel R. Muhs ([dmuhs@usgs.gov](mailto:dmuhs@usgs.gov))

- [essd-14-1271-2022-supplement-title-page.pdf](#)
- ESSD 2021 345 Supplementary tables
  - ESSD 2021 345 Table S1. Last interglacial localities by U-series methods FINAL.xlsx
  - ESSD 2021 345 Table S2. Last interglacial localities by amino acid geochronology, FINAL.xlsx
  - ESSD 2021 345 Table S3. MIS 5a (80 ka) localities FINAL.xlsx

The copyright of individual parts of the supplement might differ from the article licence.
