# Supplementary material for: MIS 5e sea-level history along the Pacific coast of North America
Source: Copernicus journal article supplement (doi:10.5194/essd-14-1271-2022), 2022-03-22
Supplement: Supplementary file 2 [file ESSD 2021 345 Table S2. Last interglacial localities by amino acid geochronology, FINAL.xlsx]

## Sheet: Sheet1
Table S2. Terrace fossil localities correlated to the sea-level high stand at ~120 ka (MIS 5e) of the last interglacial period by amino acid geochronology
WALIS	WALIS	WALIS	Country	State	Figure	Local place name, sample name	Fossil locality#*	Type of indicator	WALIS RSL ID	WALIS AAR ID (s)	Latitude**	Longitude**	Fossil locality	Shoreline angle	Mollusk genus used for	Amino acid ratio used****	Method*****	Comments	Reference
AAR Sample ID	Analysis ID	Paper ID			abbreviation						(degrees N)	(degrees W)	elevation	elevation	correlation***
													(meters)	(meters)
KV79-001	KV79-001-001	6-77-20	United States	Washington	WB	Willapa Bay	LACMIP 3953; USGS 1497	SLI	3684	361, 362, 365	46.62943	123.95835	2-3	13	Saxidomus gigantea	D/L leucine=0.300	GC	Data given are for locality "H"; study used linear kinetic modeling; disagreement with Kennedy et al. (1982)	Kvenvolden et al. (1979)
KV79-002	KV79-002-001	6-77-50
KV79-003	KV79-003-001	63-76
KN82-001	KN82-001-001	jw77-031	United States	Oregon	YB	Yaquina Bay, Yachats terrace	LACMIP 3952	SLI	3685	363, 364, 366, 367, 368	44.614	124.027	?	5-28	Leukoma staminea	D/L leucine=0.395	GC		Kennedy et al. (1982); Kelsey et al. (1996); https://www.ncei.noaa.gov/pub/data/paleo/aar/ (Wehmiller and Pellerito, 2015)
KN82-002	KN82-002-001	dfb 35													Saxidomus
KN82-003	KN82-003-001	jw76-099													Saxidomus
KN82-004	KN82-004-001	jw77-018					M4622								Saxidomus
KN82-005	KN82-005-001	jw77-019					M4622								Saxidomus
KN82-006	KN82-006-001	jw76-096	United States	California	E	Campton Road	LACMIP 3961	MLI	3686	369	40.7688	124.159	~15-17	?	Saxidomus	D/L leucine=0.424	GC	Campton Rd/Fields Landing pooled	Kennedy et al. (1982); https://www.ncei.noaa.gov/pub/data/paleo/aar/ (Wehmiller and Pellerito, 2015)
KN82-007	KN82-007-001	jw77-024	United States	California	E	Eureka, Fields Landing	CAS 54082	N/A (no elevation)	N/A (no elevation)	370	40.7	124.200	?	?	Saxidomus	D/L leucine=0.424	GC	Campton Rd/Fields Landing pooled	Kennedy et al. (1982); https://www.ncei.noaa.gov/pub/data/paleo/aar/ (Wehmiller and Pellerito, 2015)
KN82-008	KN82-008-001	80-66-1	United States	California	AH	Arroyo Hondo	USGS M7476	MLI	3687	371	34.4748	120.139	35-40	?	Saxidomus only	D/L leucine=0.530	GC		Kennedy et al. (1982, 1992); Rockwell et al. (1992); https://www.ncei.noaa.gov/pub/data/paleo/aar/
WE77-001	WE77-001-001	jw74-008	United States	California	C	Cayucos	USGS M5922; UCLA 3393	SLI	3688	372, 373, 374, 375	35.449689	120.914550	7.8	>8 but <14	Leukoma staminea	D/L leucine=0.454	GC	Calibration point, U-series, coral, ~124 ka	Wehmiller et al. (1977); Kennedy et al. (1982); Ku and Kern (1974); Valentine (1958); https://www.ncei.noaa.gov/pub/data/paleo/aar/
WE77-002	WE77-002-001	jw75-016
WE77-003	WE77-003-001	jw75-030
WE77-004	WE77-004-001	jw79-035
KN82-009	KN82-009-001	jw78-120-1	United States	California	PP	Pacific Palisades, Dume terrace	USGS M7236	MLI	3689	379, 380, 381, 382, 383	34.0426	118.571	70.4	?	Leukoma staminea	D/L leucine=0.507	GC		Wehmiller et al. (1977); Kennedy et al. (1982); McGill (1989); https://www.ncei.noaa.gov/pub/data/paleo/aar/
KN82-010	KN82-010-001	jw78-120-2					USGS M7236								Leukoma staminea
KN82-011	KN82-011-001	jw78-042-1					USGS M7234				34.0438	118.52606			Saxidomus
KN82-012	KN82-012-001	jw78-042-2					USGS M7234								Saxidomus
KN82-013	KN82-013-001	jw78-042-3					USGS M7234								Saxidomus
KN82-014	KN82-014-001	jw77-079-1	United States	California	M	Malibu, Dume terrace	USGS M1710	SLI	3690	376, 377	34.0275	118.760	~30	~38	Leukoma	D/L leucine=0.494	GC		Wehmiller et al. (1977); Kennedy et al. (1982); Addicott (1964); Birkeland (1972); https://www.ncei.noaa.gov/pub/data/paleo/aar/
KN82-015	KN82-015-001	jw77-079-2
WE77-005	WE77-005-001	jw76-016	United States	California	SP	San Pedro, Palos Verdes Sand	LACMIP 1210	MLI	3691	378	33.7618	118.283	~25	?	Saxidomus	D/L leucine=0.530	GC		Wehmiller et al. (1977); Kennedy et al. (1982); https://www.ncei.noaa.gov/pub/data/paleo/aar/
WE77-006	WE77-006-001	jw-7	United States	California	NB	Newport Mesa	M2074	MLI	3692	384, 385, 386, 387	33.6355	117.891	~25	?	Saxidomus	D/L leucine=0.501	GC	M2074 and M1722 pooled	Wehmiller et al. (1977); Kennedy et al. (1982); Vedder et al. (1957); https://www.ncei.noaa.gov/pub/data/paleo/aar/
WE77-007	WE77-007-001	jw74-015
WE77-008	WE77-008-001	jw75-022
WE77-009	WE77-009-001	jw74-012													Leukoma staminea
WE77-010	WE77-010-001	jw74-011	United States	California	NB	Newport Mesa	USGS M1722	MLI	3693	388	33.6443	117.8746	~17	?	Leukoma staminea	D/L leucine=0.501	GC	M2074 and M1722 pooled	Wehmiller et al. (1977); Kennedy et al (1982); Vedder et al. (1957); https://www.ncei.noaa.gov/pub/data/paleo/aar/
KN82-016	KN82-016-001	jw78-033-001	United States	California	SO	San Onofre	LACMIP 5574	N/A (no elevation)	N/A (no elevation)	398, 390	33.3301	117.501	?	?	Saxidomus	D/L leucine=0.530	GC		Wehmiller et al. (1977); Kennedy et al. (1982); https://www.ncei.noaa.gov/pub/data/paleo/aar/
KN82-017	KN82-017-001	jw78-033-002
WE77-011	WE77-011-001	75-001	United States	California	TP	Torrey Pines	LACMIP 2662	SLI	3694	391, 392, 393, 394, 395, 396	32.9148	117.258	~15	~20-21	Saxidomus	D/L leucine=0.493	GC		Wehmiller et al. (1977); Kennedy et al. (1982); Valentine (1960); https://www.ncei.noaa.gov/pub/data/paleo/aar/
WE77-012	WE77-012-001	76-005
KN82-018	KN82-018-001	jw77-108
KN82-019	KN82-019-001	jw77-106-1													Leukoma staminea
KN82-020	KN82-020-001	jw77-106-2
WE77-013	WE77-013-001	75-059
WE77-014	WE77-014-001	76-47	United States	California	PB	Pacific Beach, Nestor terrace	SDSU 1854	MLI	3695	397, 398, 399	32.7917	117.2500	12	?	Leukoma staminea	D/L leucine=0.543	GC		Wehmiller et al. (1977); Kern (1977); https://www.ncei.noaa.gov/pub/data/paleo/aar/
WE77-015	WE77-015-001	76-89
WE77-016	WE77-016-001	76-102
WE77-017	WE77-017-001	jw76-040	United States	California	PL	Point Loma, west side, Nestor terrace	USGS M6702	SLI	3696	400, 401	32.695	117.253	20-25	~25	Leukoma staminea	D/L leucine=0.501	GC	All Point Loma Nestor values pooled	Wehmiller et al. (1977); Ku and Kern (1974); Kern (1977); Kennedy et al. (1982); https://www.ncei.noaa.gov/pub/data/paleo/aar/
WE77-018	WE77-018-001	jw76-041
WE77-019	WE77-019-001	jw75-031	United States	California	PL	Point Loma, west side, Nestor terrace	USGS M6703	SLI	3697	402	32.692	117.252	20-25	~25	Leukoma staminea	D/L leucine=0.501	GC	All Point Loma Nestor values pooled	Wehmiller et al. (1977); Ku and Kern (1974); Kern (1977); Kennedy et al. (1982); https://www.ncei.noaa.gov/pub/data/paleo/aar/
KN82-021	KN82-021-001	jw76-066-1	United States	California	PL	Point Loma, west side, Nestor terrace	SDSU 2577		3698		32.690	117.251	20-25	~25	Leukoma staminea	D/L leucine=0.501	GC	Calibration point, U-series, coral, ~124 ka; pooled; likely mixed ages	Wehmiller et al. (1977); Ku and Kern (1974); Kern (1977); Kennedy et al. (1982); https://www.ncei.noaa.gov/pub/data/paleo/aar/
KN82-022	KN82-022-001	jw76-066-2
WE77-020	WE77-020-001	JW76-014	United States	California	PL	Point Loma, east side, Nestor terrace	SDSU 2521	SLI	3699	407	32.6727	117.2368	?	14	Leukoma staminea	D/L leucine=0.501	GC	All Point Loma Nestor values pooled	Wehmiller et al. (1977); Ku and Kern (1974); Kern (1977); Kennedy et al. (1982); https://www.ncei.noaa.gov/pub/data/paleo/aar/
WE77-021	WE77-021-001	JW76-010					M6706				32.6779	117.246		14
WE77-022	WE77-022-001	jw76-058	United States	California	PL	Point Loma, east side, Nestor terrace	SDSU 2520	SLI	3700	405, 406	32.6776	117.2379	?	14	Saxidomus nuttalli	D/L leucine=0.501	GC	All Point Loma Nestor values pooled	Wehmiller et al. (1977); Ku and Kern (1974); Kern (1977); Kennedy et al. (1982); https://www.ncei.noaa.gov/pub/data/paleo/aar/
KN82-023	KN82-023-001	jw77-050	United States	California	BL	Border Locality	SDSU 458	MLI	3701	408	32.5362	117.119	~15	?	Leukoma staminea	D/L leucine=0.522	GC		Wehmiller et al. (1977); Kennedy et al. (1982); Emerson and Addicott (1953); https://www.ncei.noaa.gov/pub/data/paleo/aar/
VA80-001	VA80-001-001	Camalú 1143	Mexico	Baja California	CM	Camalú	UCSB 1143	MLI	3702	324, 325	30.820	116.090	~10	?	Leukoma staminea	D/L leucine=0.46	GC		Valentine (1980); Keenan et al. (1987); Wehmiller and Pellerito, 2015
VA80-002	VA80-002-001	Camalú 1143				Camalú
WO80-001	WO80-001	77-38	Mexico	Baja California	PSR	Punta Santa Rosalillita	No formal fossil locality #	SLI	3962	326	28.6629	114.24	?	6-8	Chione	D/L leucine=0.56	GC		Woods (1980); Keenan et al. (1987); Wehmiller and Pellerito, 2015
EM81-005	EM81-005-001	79-64-1a	Mexico	Baja California Sur	BT	Bahia Tortugas	UCMP B-3024	MLI	3703	271,272,273,274,275,276,277	27.648	114.869	24-27	?	Chione	D/L leucine=0.63	GC		Emerson et al. (1981); Keenan et al. (1987)
EM81-005	EM81-005-002	79-64-1b
EM81-006	EM81-006-001	79-64-2
EM81-006	EM81-006-002	79-64-2
EM81-006	EM81-006-003	79-64-2R
EM81-007	EM81-007-001	79-64-3
EM81-007	EM81-007-002	79-64-3
EM81-001	EM81-001-001	79-62-1	Mexico	Baja California Sur	BT	Bahia Tortugas	UCMP 3007	MLI	3704	266,267,268,269,270	27.67064	114.9011	~12	?	Chione	D/L leucine=0.55	GC		Emerson et al. (1981); Keenan et al. (1987)
EM81-001	EM81-001-002	79-62-1
EM81-002	EM81-002-001	79-62-2
EM81-003	EM81-003-001	79-62-3
EM81-004	EM81-004-001	79-62-4
KE87-001	KE87-001-001	LR 522	Mexico	Baja California Sur	BA	Bahia Asuncion, LR 522	No formal fossil locality #	MLI	3705	322	27.154	114.265	3	?	Tivela	D/L leucine=0.630	GC		Ortlieb (1978); Keenan et al. (1987)
KE87-002	KE87-002-001	LR525	Mexico	Baja California Sur	BA	Bahia Asuncion, LR 525	No formal fossil locality #	MLI	3706	323	27.145	114.242	12	?	Tivela	D/L leucine=0.689	GC		Ortlieb (1978); Keenan et al. (1987)
WE80-001	WE80-001-001	79-33-1	Mexico	Baja California Sur	BM	Bahia Magdalena	CAS 754	SLI	3707	319,320,321	24.6452	112.1416	1 to 1.8	6	Chione	D/L leucine=0.70	GC	Calibration point, U-series, coral, ~114 ka	Wehmiller and Emerson (1980); Keenan et al. (1987); Omura et al. (1979)
WE80-002	WE80-002-001	79-33-2
WE80-002	WE80-002-002	79-33-2a
OR87-026	OR87-026-001	pers. comm.	Mexico	Baja California Sur	BM	Bahia Magdalena	CAS 754	Same as above			24.64681	112.144	1 to 1.8	6	Chione	D-allo/L-iso=0.92	HPLC	Calibration point, U-series, coral, ~114 ka	Ortlieb (1987); Omura et al. (1979); Wehmiller and Pellerito, 2015
OR87-001	OR87-001-001	LQ 315	Mexico	Baja California Sur	CSM	Caleta Santa Maria, LQ 315	No formal fossil locality #	SLI	3737	278	27.436	112.316	?	~13	Chione	D-allo/L-iso=0.82	HPLC		Ortlieb (1987)
OR87-002	OR87-002-001	LU 1005d	Mexico	Baja California Sur	SR	Santa Rosalia, LU 1005	No formal fossil locality #	MLI	3738	279	27.328	112.253	~22?	?	Chione	D-allo/L-iso=0.92	HPLC		Ortlieb (1987)
OR87-003	OR87-003-001	LU 1109a	Mexico	Baja California Sur	SL	San Lucas, LU 1109	No formal fossil locality #	MLI	3739	280	27.236	112.202	~2?	?	Chione	D-allo/L-iso=0.83	HPLC		Ortlieb (1987)
OR87-004	OR87-004-001	LU 1027a	Mexico	Baja California Sur	BSI	Bahia Santa Ines, LU 1027-1028	No formal fossil locality #	SLI	3740	281,282,283,284,285	27.070	111.968	~8?	~15?	Chione	D-allo/L-iso=0.97	HPLC		Ortlieb (1987)
OR87-004	OR87-004-002	LU 1027a													Chione
OR87-005	OR87-005-001	LU 1028a													Dosinia
OR87-005	OR87-005-002	LU 1028a													Dosinia
OR87-005	OR87-005-003	LU 1028a													Dosinia
OR87-006	OR87-006-001	LU 1051a	Mexico	Baja California Sur	BSN	Bahia San Nicolas North, LU 1051	No formal fossil locality #	SLI	3741	286	26.604	111.569	?	~16	Chione	D-allo/L-iso=0.83	HPLC	Calibration point, U-series, coral, ~131 ka	Ortlieb (1987)
OR87-007	OR87-007-001	LU 1054d	Mexico	Baja California Sur	BSN	Bahia San Nicolas South, LU 1054	No formal fossil locality #	SLI	3742	287	26.567	111.569	?	~15	Chione	D-allo/L-iso=0.90	HPLC		Ortlieb (1987)
OR87-008	OR87-008-001	LU 1046a	Mexico	Baja California Sur	BC	Bahia Concepcion, LU 1046	No formal fossil locality #	SLI	3743	288	26.601	111.682	?	~10?	Chione	D-allo/L-iso=0.96	HPLC		Ortlieb (1987)
OR87-009	OR87-009-001	LU 660a	Mexico	Sonora	SB	Salina la Borrascosa, LS 660	No formal fossil locality #	MLI	3744	289	31.516	114.128	~15	?	Chione	D-allo/L-iso=0.93	HPLC	Calibration U-series on Chione shell	Ortlieb (1987, 1991)
OR87-010	OR87-010-001	LS 647	Mexico	Sonora	PG	Punta Gorda, LS 647	No formal fossil locality #	SLI	3745	290	31.509	114.197	~22	~25?	Chione	D-allo/L-iso=0.86	HPLC		Ortlieb (1987, 1991)
OR87-011	OR87-011-001	LS 649a	Mexico	Sonora	ESB	East of Salina la Borrascosa, LS 649	No formal fossil locality #	SLI	3746	291, 292	31.495	114.099	~5	~12?	Chione	D-allo/L-iso=0.77	HPLC		Ortlieb (1987, 1991)
OR87-011	OR87-011-002	LS 649a
OR87-012	OR87-012-001	LP 49d	Mexico	Sonora	SPC	Southeast of Punta Cuevas, LP 49	No formal fossil locality #	SLI	3747	303, 304	29.554	112.432	5	~6?	Dosinia	D-allo/L-iso=0.82	HPLC	Correlated to ~120 ka if not at equilibrium	Ortlieb (1987, 1991)
OR87-012	OR87-012-002	LP 49d
OR87-013	OR87-013-001	LT 700o	Mexico	Sonora	PT	North of Punta Tepopa, LT 700	No formal fossil locality #	MLI	3748	305	29.468	112.378	~2	?	Chione	D-allo/L-iso=0.70	HPLC		Ortlieb (1987, 1991)
OR87-014	OR87-014-001	LQ 175a	Mexico	Sonora	IT	Isla Tiburon, LQ 175	No formal fossil locality #	SLI	3749	306, 307	28.758	112.322	~5	~6?	Chione	D-allo/L-iso=0.89	HPLC		Ortlieb (1987, 1991)
OR87-015	OR87-015-001	LQ 175Dp													Dosinia
OR87-016	OR87-016-001	LP 134d	Mexico	Sonora	PT	South of Punta Tepopa, LP 134	No formal fossil locality #	MLI	3750	308, 309	29.330	112.387	~6	?	Chione	D-allo/L-iso=0.84	HPLC		Ortlieb (1987, 1991)
OR87-017	OR87-017-001	LP 134Dp													Dosinia
OR87-018	OR87-018-001	LP 63	Mexico	Sonora	PLI	Puerto Libertad, LP 63	No formal fossil locality #	SLI	3765	310, 311	29.906	112.696	~2-3	~6?	Chione	D-allo/L-iso=0.86	HPLC		Ortlieb (1987, 1991)
OR87-019	OR87-019-001	LP 58Dp	Mexico	Sonora	PLI	Puerto Libertad, LP 58	No formal fossil locality #				29.906	112.696	~2-3	~6?	Dosinia	D-allo/L-iso=0.89	HPLC	Correlated to ~120 ka if not at equilibrium	Ortlieb (1987, 1991)
OR87-020	OR87-020-001	LQ 202	Mexico	Sonora	PLO	Puerto Lobos, LQ 202	No formal fossil locality #	SLI	3766	312	30.271	112.842	~4	~6?	Dosinia	D-allo/L-iso=0.86	HPLC	Correlated to ~120 ka if not at equilibrium	Ortlieb (1987, 1991)
OR87-021	OR87-021-001	LQ 181Dp	Mexico	Sonora	PC	Punta Cuevas, LQ 181	No formal fossil locality #	SLI	3767	313, 314	29.682	112.537	5	~6?	Dosinia	D-allo/L-iso=0.98	HPLC	Correlated to ~120 ka if not at equilibrium	Ortlieb (1987, 1991)
OR87-022	OR87-022-001	LQ 181a
OR87-023	OR87-023-001	LQ 159c	Mexico	Sonora	IT	Isla Tiburon, LQ 159	No formal fossil locality #	SLI	3768	315	29.220	112.344	~4	~6?	Dosinia	D-allo/L-iso=0.95	HPLC	Correlated to ~120 ka if not at equilibrium	Ortlieb (1987, 1991)
OR87-024	OR87-024-001	LQ 149a	Mexico	Sonora	IT	Isla Tiburon, LQ 149	No formal fossil locality #	SLI	3769	316	29.101	112.243	~2	~6?	Dosinia	D-allo/L-iso=0.91	HPLC	Correlated to ~120 ka if not at equilibrium	Ortlieb (1987, 1991)
OR87-025	OR87-025-001	LP 28	Mexico	Sonora	PK	Punta Kino, LP 28	No formal fossil locality #	SLI	3770	317	28.732	111.925	~2	~6?	Dosinia	D-allo/L-iso=0.90	HPLC		Ortlieb (1987, 1991)
MU92-003	MU92-003-001	5358 A-E	United States	California	PVH	Palos Verdes Hills, Gaffey ("4th") terrace	LACMIP 24243	SLI	3771	340	33.71003	118.29296	~64	~72	Tegula	D-allo/L-iso=0.58	HPLC		Muhs et al. (1992a)
MU92-004	MU92-004-001	5362 A-E	United States	California	SP	San Pedro, Palos Verdes Sand	LACMIP loc. 12606	MLI	3772	341	33.74248	118.28640	~27	?	Leukoma staminea	D-allo/L-iso=0.36	HPLC	Higher D/L values than USGS 12138, correlated to 80 ka on Tegula	Muhs et al. (1992a)
MU92-005	MU92-005-001	6456 A-F	United States	California	SP	San Pedro, Palos Verdes Sand	LACMIP loc. 12576	MLI	3773	342	33.763750	118.283126	~24	?	Leukoma staminea	D-allo/L-iso=0.34	HPLC	Higher D/L values than USGS 12138, correlated to 80 ka on Tegula	Muhs et al. (1992a)
MU92-006	MU92-006-001	5038 B-E	United States	California	SNI	San Nicolas Island, Vizcaino Point	LACMIP 10622	SLI	3774	343, 354, 355	33.261620	119.568638	31.5	shoal	Tegula	D-allo/L-iso=0.525	HPLC	Calibration point, U-series, coral, ~120 ka	Muhs et al. (1992a, 1992b)
MU92-007	MU92-007-001	3650 A-E	United States	California	SCI	San Clemente Island, Eel Point	LACMIP 10725	SLI	3775	344	32.918993	111.545047	12.4	24	Tegula	D-allo/L-iso=0.59	HPLC	Calibration Point, U-series, coral ~127 ka	Muhs et al. (1992a, 1992b); Muhs and Szabo (1982)
MU14-001	MU14-001-001	12752 A-D	United States	California	CP	Cayucos Point	LACMIP 11923	SLI	3776	345, 346	35.449814	120.951058	3.5	~8	Tegula	D/L glutamic acid=0.413	RPLC	Calibration point, U-series, coral, ~120 ka	Muhs et al. (2002, 2014)
MU14-002	MU14-002-001	12586 B-F													Epilucina californica
MU14-003	MU14-003-001	13382 A-E	United States	California	PSC	Point San Luis	LACMIP 11761	SLI	3777	347	35.160422	120.756692	12.2	12.8	Tegula	D/L glutamic acid=0.450	RPLC	Calibration point, U-series, coral, ~120 ka	Muhs et al. (1994, 2014)
MU14-004	MU14-004-001	12648 A-E	United States	California	SMI	San Miguel Island, SMI-236	LACMIP 42929	SLI	3778	348, 349	34.019883	120.316267	21.3	22	Tegula	D/L glutamic acid=0.374	RPLC	Calibration point, U-series, coral, ~120 ka	Muhs et al. (2014)
MU14-005	MU14-005-001	12647 A-E													Epilucina californica
MU14-006	MU14-006-001	14024 A-F	United States	California	SRI	Santa Rosa Island, SRI-5F	LACMIP 42940	SLI	3779	350,351	34.002983	120.192800	21	24	Tegula	D/L glutamic acid=0.434	RPLC	Calibration point, U-series, coral, ~120 ka	Muhs et al. (2014)
MU14-007	MU14-007-001	14025 A-D													Epilucina californica
MU14-008	MU14-008-001	12751 A-D	United States	California	SRI	Santa Rosa Island, SRI-4, Johnsons Lee	LACMIP 42936	SLI	3780	352	33.90542	120.10620	14.3	20	Tegula	D/L glutamic acid=0.513	RPLC		Muhs et al. (2014)
MU14-009	MU14-009-001	12649 A-D	United States	California	SRI	Santa Rosa Island, SRI-25, China Camp	LACMIP 42955	SLI	3781	454	33.91733	120.16100	16	>16 but <33.7	Tegula	D/L glutamic acid=0.523	RPLC		Muhs et al. (2014)
MU14-010	MU14-010-001	12750 A-D	United States	California	SRI	Santa Rosa Island, SRI-1, Coati Point	LACMIP 42930	MLI	3782	353	34.030983	120.045233	6	>7	Tegula	D/L glutamic acid=0.385	RPLC	Mixed age population likely	Muhs et al. (2014)
MU14-011	MU14-011-001	12637 A-E	United States	California	SNI	San Nicolas Island	LACMIP 10622				33.261620	119.568638	31.5	shoal?	Tegula	D/L glutamic acid=0.501	RPLC	Calibration point, U-series, coral, ~120 ka	Muhs et al. (2006, 2014)
MU14-012	MU14-012-001	12595 A-E													Epilucina californica
MU14-013	MU14-013-001	12640 A-E	United States	California	PVH	Palos Verdes Hills, Gaffey terrace	LACMIP 12608	SLI	3784	356	33.73163	118.34925	65	>67 but <96	Tegula	D/L glutamic acid=0.562	RPLC	Calibration point, U-series, coral, ~120 ka	Muhs et al. (2006, 2014)
MU14-014	MU14-014-001	13384 A-E	United States	California	PL	Point Loma, Nestor terrace	LACMIP 10167	SLI	3785	357	32.691462	117.250932	20-25	~25	Tegula	D/L glutamic acid=0.573	RPLC	Mixed age population; calibration point, U-series, coral, ~120 ka	Muhs et al. (2002, 2014)
MU14-015	MU14-015-001	12642 A-E	Mexico	Baja California	PB	Punta Banda, Sea Cave terrace	LACMIP 8222	SLI	3786	358, 359	31.7264	116.6798	~21	~30	Tegula	D/L glutamic acid=0.530	RPLC	Correlated to U-series-dated (~120 ka) site nearby	Muhs et al. (2002, 2014); Rockwell et al. (1989)
MU14-016	MU14-016-001	12603 A-D													Epilucina californica
MU18-001	MU18-001-001	14085 A-E	United States	California	SCRZI	Fraser Point, SCRZI-111	LACMIP 42337	SLI	3789	328	34.06146	119.92039	6.3	8.3	Tegula	D/L glutamic acid=0.461	RPLC		Muhs and Groves (2018)
MU18-002	MU18-002-001	14083 A-E	United States	California	SCRZI	Fraser Point, SCRZI-107	LACMIP 42335	SLI	3790	329	34.05866	119.91707	4.2	>4.2 but <11.4	Tegula	D/L glutamic acid=0.500	RPLC		Muhs and Groves (2018)
MU18-003	MU18-003-001	13381 B,C,D,E 14072 A	United States	California	ANA	West Anacapa Island, Frenchys Cove	LACMIP 42322, 42323	SLI	3791	330, 331, 335	34.00723	119.41061	4.7	11.1	Tegula	D/L glutamic acid=0.378	RPLC	Mixed age population	Muhs and Groves (2018)
MU18-004	MU18-004-001	13381 A, 14072 B,C,D,E	United States	California	ANA	West Anacapa Island, Frenchys Cove	LACMIP 42322, 42323				34.00723	119.41061	4.7	11.1	Tegula	D/L glutamic acid=0.510	RPLC	Mixed age population	Muhs and Groves (2018)
MU18-005	MU18-005-001	14077 A-E	United States	California	SBI	Santa Barbara Island, SBI-5	LACMIP 42324	SLI	3792	332	33.468549	119.031148	4.3	6.7	Tegula	D/L glutamic acid=0.385	RPLC	Mixed age population	Muhs and Groves (2018)
MU18-006	MU18-006-001	12635 A-C	United States	California	SBI	Santa Barbara Island, SBI-5	LACMIP 42325	SLI	3793	333	33.47406	119.03073	4.3	6.7	Tegula	D/L glutamic acid=0.497	RPLC	Mixed age population	Muhs and Groves (2018)
MU18-007	MU18-007-001	9929 A-E	United States	California	TB	Tomales Bay, Toms Point	LACMIP 43031	MLI	3794	334	38.21773	122.95385	8.75	?	Chione	D-allo/L-iso=0.337	HPLC	Luminescene age of ~130 ka	Muhs and Groves (2018); Grove et al. (1995)
MU18-008	MU18-008-001	14067 A-D	United States	California	ANA	West Anacapa Island, Frenchys Cove	LACMIP 42322, 42323	SLI			34.00723	119.41061	4.7	11.1	Chione	D-allo/L-iso=0.378	HPLC		Muhs and Groves (2018)
MU18-009	MU18-009-001	14068 A-E	United States	California	SP	San Pedro, Palos Verdes Sand	150 m N of LACMIP 12576	MLI	3795	336	33.764960	118.282473	17.2	?	Chione	D-allo/L-iso=0.550	HPLC		Muhs and Groves (2018)
MU18-010	MU18-010-001	9940 A-E	United States	California	NB	Newport Mesa	LACMIP 66-2	SLI	3796	337	33.643611	117.876945	~24	~34	Chione	D-allo/L-iso=0.469	HPLC	Calibration point, U-series, coral, ~122 ka	Muhs and Groves (2018); Grant et al. (1999); Kanakoff and Emerson (1959)
MU18-011	MU18-011-001	12439 A-E	Mexico	Sonora	PP	West of Puerto Peñasco	No formal fossil locality #	MLI	3797	338	31.4758	113.6294	~6	?	Chione	D-allo/L-iso=0.93	HPLC		Muhs and Groves (2018)
MU18-012	MU18-012-001	14070 A-E	Mexico	Baja California Sur	BM	Bahia Magdalena	LACMIP 489	SLI	3798	339	24.5188	111.9500	1 to 1.8	6	Chione	D-allo/L-iso=0.885	HPLC	Calibration point, U-series, coral, ~114 ka	Muhs and Groves (2018); Omura et al. (1979)
*LACMIP = Natural History Museum of Los Angeles County, Invertebrate Paleontology
USGS M = U.S. Geological Survey, Menlo Park
SDSU = San Diego State University
AMNH = American Museum of Natural History
CAS = California Academy of Sciences
UCLA = University of California, Los Angeles
UCSB = University of California, Santa Barbara
UCMP = University of California Museum of Paleontology
**Coordinates measured in the field by the author are accurate to ± 1 m; coordinates elsewhere in the USA probably accurate to ± 10 m; coordinates in Mexico probably accurate to ± 100 m
***In entries for Kennedy et al. (1982), where Leukoma (formerly Protothaca) is present, D/L values for this taxon were converted to equivalent Saxidomus D/L values using regression equation in Lajoie et al. (1980)
****Value for single shell or mean value for multiple shells; see original sources for shell-by-shell values
*****GC=gas chromatography; HPLC=high-pressure liquid chromatography; RPLC=reverse-phase liquid chromatography
