# Supplementary material for: MIS 5e sea-level history along the Pacific coast of North America
Source: Copernicus journal article supplement (doi:10.5194/essd-14-1271-2022), 2022-03-22
Supplement: Supplementary file 3 [file ESSD 2021 345 Table S3. MIS 5a (80 ka) localities FINAL.xlsx]

## Sheet: Sheet1
Table S3. Terrace fossil localities dated to sea-level high stands of ~80 ka (MIS 5a) by U-series methods and amino acid geochronology
Country	State	Figure	Local place name, sample name	Terrace	Fossil locality#*	Latitude**	Longitude**	Fossil locality	Shoreline angle	Coral species	Growth	Number of	U-series	Best age	Back-calculated	Comments	Reference
		abbreviation				(degrees N)	(degrees W)	elevation	elevation		position?	analyses	method***	estimates (ka)****	initial 234U/238U****
								(meters)	(meters)
Terraces dated to MIS 5a (~80 ka) by U-series methods on coral
United States	Oregon	CP	Coquille Point	Whisky Run terrace	LACMIP 2636; USGS M2798	43.11408	124.43600	15.5	28-40	Balanophyllia elegans	No	3	TIMS	78.2-81.9	1.144-1.145		Muhs et al. (1990, 2006)
United States	California	PA	Point Arena	Qt1 terrace	USGS M7824	38.9527	123.7382	16.5	~20-25	Balanophyllia elegans	No	1	TIMS	83.2	1.115	Uncertain how age may be biased by lower initial 234U/238U	Muhs et al. (2006)
United States	California	PA	Point Arena	Qt1 terrace	USGS M7824	38.9527	123.7382	16.5	~20-25	Balanophyllia elegans	No	1	AS	76.5	1.149		Muhs et al. (1994)
United States	California	PA	Point Arena	Qt1 terrace	LACMIP 4816	38.9559	123.7357	~6?	~20-25	Balanophyllia elegans	No	1	AS	88.7	1.141		Muhs et al. (1994)
United States	California	GO	Green Oaks Creek	Davenport terrace	LACMIP 5019; USGS M2147	37.1322	122.3372	5	~19-20	Balanophyllia elegans	No	13	TIMS	76.2-84.4	1.145-1.153		Muhs et al. (2006)
United States	California	AN	Point Año Nuevo	Davenport terrace	USGS M1690, M5925	37.1170	122.3186	10	~19-20	Balanophyllia elegans	No	1	TIMS	75.7	1.139	Uncertain how age may be biased by lower initial 234U/238U	Muhs et al. (2006); Bradley and Griggs (1976)
United States	California	SC	Point Santa Cruz	Davenport terrace	USGS M1691, M5924	36.9513	122.0314	6	~10?	Balanophyllia elegans	No	1	TIMS	71.4	1.151		Muhs et al. (2006); Bradley and Griggs (1976)
United States	California	SRI	Santa Rosa Island	1st terrace	LACMIP 42957	34.0087	120.239	4	7.4	Balanophyllia elegans	No	6	TIMS	78.6-82.9	1.154-1.144		Muhs et al. (2015)
United States	California	PV	Palos Verdes Hills, Golden Cove	Paseo del Mar ("2nd") terrace	Golden Cove	33.752587	118.412987	33-34	~45-47	Balanophyllia elegans	No	4	TIMS	82.6-84.0	1.154-1.159	Mapped as "terrace 2" by Woodring et al. (1946)	Muhs et al. (2006)
United States	California	PV	Palos Verdes Hills, Point Fermin	Paseo del Mar ("2nd") terrace	SDSNH 0625	33.707270	118.294836	30-35	~45-47	Balanophyllia elegans	No	1	TIMS	78.4	1.144	Mapped as "terrace 2" by Woodring et al. (1946)	Muhs et al. (2006)
United States	California	PV	Palos Verdes Hills, Forrestal Canyon	Paseo del Mar ("2nd") terrace	LACMIP 12575	33.729922	118.352046	43	~45-47	Balanophyllia elegans	No	8	TIMS	79.2-79.3	1.130-1.132	Uncertain how age may be biased by lower initial 234U/238U	Muhs et al. (2006)
United States	California	SNI	San Nicolas Island, east of Vizcaino Point	1st terrace	LACMIP 10620	33.271000	119.563783	5	13?	Balanophyllia elegans	No	1	AS	87.6	1.154		Muhs et al. (1994)
United States	California	SNI	San Nicolas Island, Vizcaino Point	1st terrace	LACMIP 10621	33.274233	119.575785	~10-12	13.3	Balanophyllia elegans	No	1	AS	80.7	1.175		Muhs (1992); Muhs et al. (1994)
United States	California	SNI	San Nicolas Island, Cormorant Point	1st terrace	LACMIP 12005	33.247743	119.564801	~9	13?	Balanophyllia elegans	No	13	TIMS	76.1-87.0	1.146-1.150		Muhs et al. (2006)
United States	California	SNI	San Nicolas Island, Vizcaino Point	1st terrace	LACMIP 11009	33.2579	119.5715	6.8	13.3	Balanophyllia elegans	No	1	AS	80.7	1.151		Muhs (1992); Muhs et al. (1994)
United States	California	SNI	San Nicolas Island, Vizcaino Point	1st terrace	LACMIP 11009	33.2579	119.5715	6.8	13.3	Balanophyllia elegans	No	5	TIMS	76.9-78.5	1.153-1.155		Muhs et al. (2006)
United States	California	SNI	San Nicolas Island, Army Camp Beach	1st terrace	LACMIP 11004	33.265236	119.495916	9	10	Balanophyllia elegans	No	6	TIMS	79.4-82.8	1.170-1.185		Muhs et al. (2012)
United States	California	SNI	San Nicolas Island, Army Camp Beach	1st terrace	LACMIP 11004	33.265236	119.495916	9	10	Balanophyllia elegans	No	1	AS	80.3	1.176		Muhs et al. (1994)
United States	California	PL	Point Loma	Bird Rock terrace	LACMIP 11701; SDSU F2523	32.6657	117.2416	<8	8	Balanophyllia elegans	No	3	TIMS	87.9	1.179	Mixed age population; includes ~100 ka and ~120 ka corals	Muhs et al. (2002)
United States	California	PL	Point Loma	Bird Rock terrace	LACMIP 11701; SDSU F2523	32.6657	117.2416	<8	8	Balanophyllia elegans	No	1	AS	85.8	1.166		Muhs et al. (1994)
Mexico	Baja California	PB	Punta Banda	Lighthouse terrace	LACMIP 10619	31.748860	116.741457	?	17.5	Balanophyllia elegans	No	8	TIMS	79.8-80.6	1.153-1.151		Muhs et al. (2002); Rockwell et al. (1989)
Mexico	Baja California	PB	Punta Banda	Lighthouse terrace	LACMIP 10619	31.748860	116.741457	?	17.5	Balanophyllia elegans	No	1	AS	79.3	1.138	Uncertain how age may be biased by lower initial 234U/238U	Muhs et al. (1994); Rockwell et al. (1989)
Terraces correlated to MIS 5a (~80 ka) by amino acid geochronology on mollusks
United States	Washington	BC	Willapa Bay, Bay Center	Unnamed	LACMIP 3953; USGS M1497	46.62952	123.95823	3.5	?	Saxidomus gigantea	No		n/a	n/a	n/a	Interpreted to be ~120 ka by Kvenvolden et al. (1979)	Kennedy et al. (1982a)
United States	Oregon	NJ	Newport Jetty	Newport terrace	CAS 40	44.623	124.063	~28	28-40	Saxidomus gigantea	No		n/a	n/a	n/a		Kennedy et al. (1982a)
United States	Oregon	FP	Fivemile Point	Whisky Run terrace	LACMIP 3950, 3951; USGS M4623	43.2201	124.3968	~32	28-40	Saxidomus gigantea	No		n/a	n/a	n/a		Kennedy et al. (1982a)
United States	Oregon	CP	Coquille Point, Bandon	Whisky Run terrace	LACMIP 2636; USGS M2798	43.11408	124.43600	15.5	28-40	Saxidomus gigantea	No		n/a	n/a	n/a	Correlation supported by later U-series ages	Kennedy et al. (1982a)
United States	Oregon	CB	Cape Blanco	Cape Blanco terrace	LACMIP 2641; USGS M1450	42.83411	124.55562	~50	?	Saxidomus gigantea	No		n/a	n/a	n/a	Lower amino acid ratios suggested an age <80 ka	Kennedy et al. (1982a)
United States	Oregon	CB	Cape Blanco	Cape Blanco terrace	LACMIP 2641; USGS M1450	42.83411	124.55562	~50	?	Saxidomus gigantea	No		n/a	n/a	n/a	Amino acids allow correlation to ~80 ka Coquille Point	Muhs et al. (1990)
United States	Oregon	CB	Cape Blanco	Pioneer terrace	USGS M1452	42.8171	124.5367	~57	?	Saxidomus gigantea	No		n/a	n/a	n/a	Amino acids allow correlation to either ~80 ka or ~100 ka	Muhs et al. (1990)
United States	California	CC	Crescent City	"Battery Formation"	LACMIP 3946; USGS M1449; CAS 34110	41.76103	124.22436	3.65	?	Saxidomus gigantea	No		n/a	n/a	n/a		Kennedy et al. (1982a)
United States	California	PA	Point Arena	Qt1 terrace	LACMIP 4816	38.9559	123.7357	~6?	~20-25	Saxidomus gigantea	No		n/a	n/a	n/a	Correlation supported by later U-series ages	Kennedy et al. (1982a)
United States	California	HB	Half Moon Bay	"Half Moon Bay" terrace	USGS M7814	37.5098	122.501	-7.7 to -9.5	?	Saxidomus gigantea	No		n/a	n/a	n/a		Kennedy et al. (1982a, 1982b)
United States	California	AN	Point Año Nuevo	Davenport terrace	USGS M1690, M5925	37.1170	122.3186	10	~19-20	Saxidomus gigantea	Yes		n/a	n/a	n/a	Correlation supported by later U-series ages	Wehmiller et al. (1977); Kennedy et al. (1982a)
United States	California	SC	Point Santa Cruz	Davenport terrace	USGS M1691, M5924	36.9513	122.0314	6	~10?	Saxidomus gigantea	No		n/a	n/a	n/a	Correlation supported by later U-series ages	Wehmiller et al. (1977); Kennedy et al. (1982a)
United States	California	AH	Arroyo Hondo	Terrace I	USGS M7491; LACMIP 8234	34.4736	120.138	17-20	20	Saxidomus gigantea	No		n/a	n/a	n/a		Kennedy et al. (1982a, 1992); Rockwell et al. (1992)
United States	California	G	Gaviota Beach, west 1.46 km	Terrace I	USGS M5919	34.4689	120.244	20	30	Saxidomus	No		n/a	n/a	n/a	Correlation supported by concordant U-series ages on bone	Kennedy et al. (1982a, 1992); Rockwell et al. (1992)
United States	California	PL	Point Loma	Bird Rock	SDSU 2523	32.6657	117.2416	<8	8	Protothaca staminea	No		n/a	n/a	n/a	Correlation supported by later U-series ages	Wehmiller et al. (1977); Kennedy et al. (1982a); Kern (1977)
*LACMIP = Natural History Museum of Los Angeles County, Invertebrate Paleontology
USGS M = U.S. Geological Survey, Menlo Park
SDSU = San Diego State University
CAS = California Academy of Sciences
**Coordinates measured in the field by the author are accurate to ± 1 m; coordinates elsewhere in the USA and northern Mexico probably accurate to ± 10 m
***TIMS = thermal ionization mass spectrometry; AS = alpha spectrometry
****Recalculated ages and initial 234U/238U values based on half-lives in Cheng et al. (2013)
